# Supplementary material
Source: PubMed Central journal article supplement (PMC5610106)
Supplement: NIHMS905445-supplement-supplement_1.pdf [file NIHMS905445-supplement-supplement_1.pdf]

## Supplemental Material 1: Appendix Tables

Table A1. Differential mean changes in trunk fat, VAT, and TAT between week 0 and week 96 for the “Gained Some/Somewhat Larger” and “Gained A Lot/Much Larger” self-reported categories relative to the “No change/Lost” category in A5260s study population (N=328).

| Subgroup                              | Trunk Fat, kg |                                      |                                      | VAT, cm <sup>2</sup> |                                      |                                      | TAT, cm <sup>2</sup> |                                      |                                      |
|---------------------------------------|---------------|--------------------------------------|--------------------------------------|----------------------|--------------------------------------|--------------------------------------|----------------------|--------------------------------------|--------------------------------------|
|                                       | N             | Gained Some/<br>Somewhat Larger      | Gained A Lot/<br>Much Larger         | N                    | Gained Some/<br>Somewhat Larger      | Gained A Lot/<br>Much Larger         | N                    | Gained Some/<br>Somewhat Larger      | Gained A Lot/<br>Much Larger         |
|                                       |               | Differential Mean<br>Change (95% CI) | Differential Mean<br>Change (95% CI) |                      | Differential Mean<br>Change (95% CI) | Differential Mean<br>Change (95% CI) |                      | Differential Mean<br>Change (95% CI) | Differential Mean<br>Change (95% CI) |
| <b>Overall</b>                        | 282           | 1.9 (1.1, 2.6)                       | 4.1 (2.8, 5.5)                       | 281                  | 17.0 (8.4, 25.6)                     | 48.3 (32.3, 64.4)                    | 281                  | 59.3 (37.1, 81.5)                    | 117.3 (75.9, 158.8)                  |
| <b>Sex</b>                            |               |                                      |                                      |                      |                                      |                                      |                      |                                      |                                      |
| <i>Male</i>                           | 252           | 1.8 (1.1, 2.5)                       | 4.5 (3.1, 6.0)                       | 252                  | 17.1 (8.0, 26.1)                     | 49.8 (32.5, 67.1)                    | 252                  | 55.7 (34.6, 76.8)                    | 132.2 (91.9, 172.5)                  |
| <i>Female</i>                         | 30            | 2.6 (-0.6, 5.7)                      | 1.9 (-2.9, 6.7)                      | 29                   | 12.5 (-17.8, 42.8)                   | 41.1 (-4.9, 87.2)                    | 29                   | 81.2 (-39.5, 201.8)                  | 36.9 (-146.4, 220.2)                 |
| <b>Baseline BMI, kg/m<sup>2</sup></b> |               |                                      |                                      |                      |                                      |                                      |                      |                                      |                                      |
| <i>Underweight/Normal:<br/>≤24.9</i>  | 153           | 1.5 (0.7, 2.4)                       | 4.7 (2.5, 6.9)                       | 152                  | 21.6 (12.0, 31.2)                    | 46.0 (23.5, 68.5)                    | 152                  | 59.8 (33.1, 86.5)                    | 149.5 (87.0, 212.0)                  |
| <i>Overweight: 25-29.9</i>            | 85            | 1.6 (0.4, 2.7)                       | 5.9 (3.7, 8.2)                       | 84                   | 11.3 (-4.8, 27.4)                    | 74.1 (43.5, 104.7)                   | 84                   | 53.2 (17.9, 88.5)                    | 177.8 (110.6, 245.1)                 |
| <i>Obese: ≥30.0</i>                   | 44            | 3.8 (1.1, 6.6)                       | 3.1 (-0.3, 6.6)                      | 45                   | 12.8 (-19.9, 45.5)                   | 34.5 (-7.00, 75.9)                   | 45                   | 75.6 (-8.0, 159.1)                   | 70.1 (-35.9, 176.1)                  |
| <b>Race/Ethnicity</b>                 |               |                                      |                                      |                      |                                      |                                      |                      |                                      |                                      |
| <i>White Non-Hispanic</i>             | 129           | 2.5 (1.4, 3.6)                       | 5.7 (3.4, 7.9)                       | 127                  | 14.4 (1.3, 27.5)                     | 58.6 (31.8, 85.4)                    | 127                  | 73.3 (38.6, 108.0)                   | 157.2 (86.1, 228.2)                  |
| <i>Black Non-Hispanic</i>             | 85            | 0.9 (-0.3, 2.2)                      | 3.3 (0.9, 5.7)                       | 85                   | 16.1 (1.0, 31.1)                     | 59.0 (32.3, 85.7)                    | 85                   | 46.0 (6.2, 85.7)                     | 144.1 (73.7, 214.4)                  |
| <i>Hispanic</i>                       | 55            | 2.5 (0.9, 4.2)                       | 2.6 (-0.3, 5.5)                      | 56                   | 32.1 (9.7, 54.5)                     | 22.8 (-17.2, 62.8)                   | 56                   | 65.6 (23.3, 107.9)                   | 71.4 (-4.2, 147.0)                   |
| <i>Other</i>                          | 12            | 2.5 (-0.04, 5.0)                     | 5.7 (2.3, 9.0)                       | 12                   | 8.5 (-12.2, 29.2)                    | 28.0 (0.6, 55.4)                     | 12                   | 65.8 (-58.9, 190.6)                  | 7.2 (-157.8, 172.3)                  |
| <b>Age, years</b>                     |               |                                      |                                      |                      |                                      |                                      |                      |                                      |                                      |
| <i>18-30</i>                          | 81            | 2.2 (0.5, 3.9)                       | 2.1 (-2.4, 6.6)                      | 83                   | 13.6 (0.6, 26.7)                     | 15.7 (-14.3, 45.7)                   | 83                   | 65.4 (25.2, 105.7)                   | 86.4 (-6.4, 179.2)                   |
| <i>31-50</i>                          | 170           | 2.0 (1.2, 2.8)                       | 4.8 (3.4, 6.2)                       | 168                  | 20.7 (9.4, 32.0)                     | 47.6 (27.6, 67.6)                    | 168                  | 66.5 (38.8, 94.3)                    | 145.1 (96.0, 194.1)                  |
| <i>51-76</i>                          | 31            | 0.3 (-1.8, 2.4)                      | 3.4 (-0.1, 6.8)                      | 30                   | 6.5 (-29.2, 42.2)                    | 93.1 (35.7, 150.4)                   | 30                   | -0.3 (-91.1, 90.5)                   | 23.6 (-122.3, 169.4)                 |

<sup>a</sup>VAT = Visceral Adipose Tissue; TAT = Total Adipose Tissue; CI = Confidence Interval

Table A2. Differential mean changes in trunk fat, VAT, and TAT between self-reported abdominal size change categories adjusted for multiple comparisons in A5260s study population (N=328).

|                                                                 | Trunk Fat, kg                                  |         | VAT, cm <sup>2</sup>                           |         | TAT, cm <sup>2</sup>                           |         |
|-----------------------------------------------------------------|------------------------------------------------|---------|------------------------------------------------|---------|------------------------------------------------|---------|
|                                                                 | Differential Mean Change (Simultaneous 95% CI) | P-value | Differential Mean Change (Simultaneous 95% CI) | P-value | Differential Mean Change (Simultaneous 95% CI) | P-value |
| <b>Gained A Lot/Much larger vs. Gained Some/Somewhat larger</b> | 2.28 (0.60 - 3.96)                             | 0.0044  | 31.32 (11.71 - 50.93)                          | 0.0006  | 58.04 (7.48 - 108.60)                          | 0.0198  |
| <b>Gained A Lot/Much larger vs. No Change/Lost weight</b>       | 4.13 (2.49 - 5.78)                             | <.0001  | 48.32 (29.09 - 67.6)                           | <.0001  | 117.34 (67.76 - 166.92)                        | <.0001  |
| <b>Gained Some/Somewhat larger vs. No Change/Lost weight</b>    | 1.9 (0.99 - 2.72)                              | <.0001  | 17.00 (6.67 - 27.33)                           | 0.0004  | 59.30 (32.67 - 85.93)                          | <.0001  |

<sup>a</sup>VAT = Visceral Adipose Tissue; TAT = Total Adipose Tissue; CI = Confidence Interval

## Supplemental Digital Content 2: A5260s Acknowledgement Appendix

Cathi Basler and Jere Hamilton - University of Colorado Hospital CRS (Site 6101) Grant 2UM1AI069432, 2UM1AI069432

1201 University of Southern California CRS

Michelle Saemann RN BSN and Carl J Fichtenbaum MD - University of Cincinnati CRS (Site 2401) Grant UM1AI068636

Ruben Lopez and Sadia Shaik - Harbor-UCLA CRS (Site 603) Grants ACTG: A1069424 and UCLA CTSI: UL1TR000124

Lisa Kessels BSN RN BS and Teresa Spitz BSN RN - Washington University CRS (Site 2101) Grant AI69439

Bonnie Kane and Nina Lambert - Northwestern University CRS (Site 2701) Grant AI 069471

Sher Storey PA-C and Shelia Dunaway MD - University of Washington ACTU (Site 1401) Grants UM AI69481, UL1TR000423, KL2TR000421, and TL1TR000422

Rebecca Basham and Vicki Bailey – Vanderbilt Therapeutics CRS (Site 3652) Grant UM1 AI069439, UL1 TR000445

David Currin RN BSN and Miriam Chicurel-Bayard RN BSN - UNC Chapel Hill CRS (Site 3201) Grants UM1 AI069423, CTSA: 1UL1TR001111, CFAR: P30 AI50410

Judith A Aberg MD and Michelle S Cespedes MD MS - New York University/Bellevue ACTU (Site 401) Grant UM1 AI069532

Kristen Allen BSN RN CCRP and Jane Baum BSN RN CCRP - Case CRS (Site 2501) Grant AI69501

201 Johns Hopkins University CRS

Dr Susan Koletar and Mark Hite RN - Ohio State University CRS (Site 2301) Grant UM1AI069494

Dr Roberto C Arduino and Martine M Diez - Houston AIDS Research Team CRS HART (Site 31473) Grant 2 UM1 AI069503

31786 New Jersey Medical School Clinical Research Center CRS

Dr Emery Chang MD and Maria Palmer PA - UCLA Care Center CRS (Site 601) Grant AI069424

1108 Trillium Health ACTG CRS

Beverly E Sha MD and Veronica Navarro ARNP - Rush University Medical Center CRS (Site 2702) Grant U01 AI069471

103 Beth Israel

Paul Sax MD and Cheryl Keenan RN BC - Brigham and Women's Hospital CRS (Site 107) Grant  
UM1AI069412, UM1AI068636

Sharon A Riddler MD MPH and Lisa Klevens RN BSN - University of Pittsburgh CRS (Site 1001) Grant  
UM1AI069494

Annie Luetkemeyer MD and Jay Dwyer RN - UCSF AIDS CRS (Site 801) CTU Grant 5UM1AI069496

Mary Adams RN and Christine Hurley RN - University of Rochester (Site 31787) Grant UM1 AI069511,  
UL1 TR000042

Susanna Naggie MD MHS and Heather Adams RN BSN - Duke University CRS (Site 1601) Grant  
5U01HL12333

5802 The Ponce de Leon Center CRS

2503 MetroHealth CRS
